# Supplementary material for: Phylogenomic Reconstruction of the Oomycete Phylogeny Derived from 37 Genomes
Source: PubMed Central journal article supplement (PMC5390094; doi:10.1128/msphere.00095-17), 2017-04-12

# Taxonomy

- Saprolegniales
- Peronosporales
- Albuginales
- Pythiales

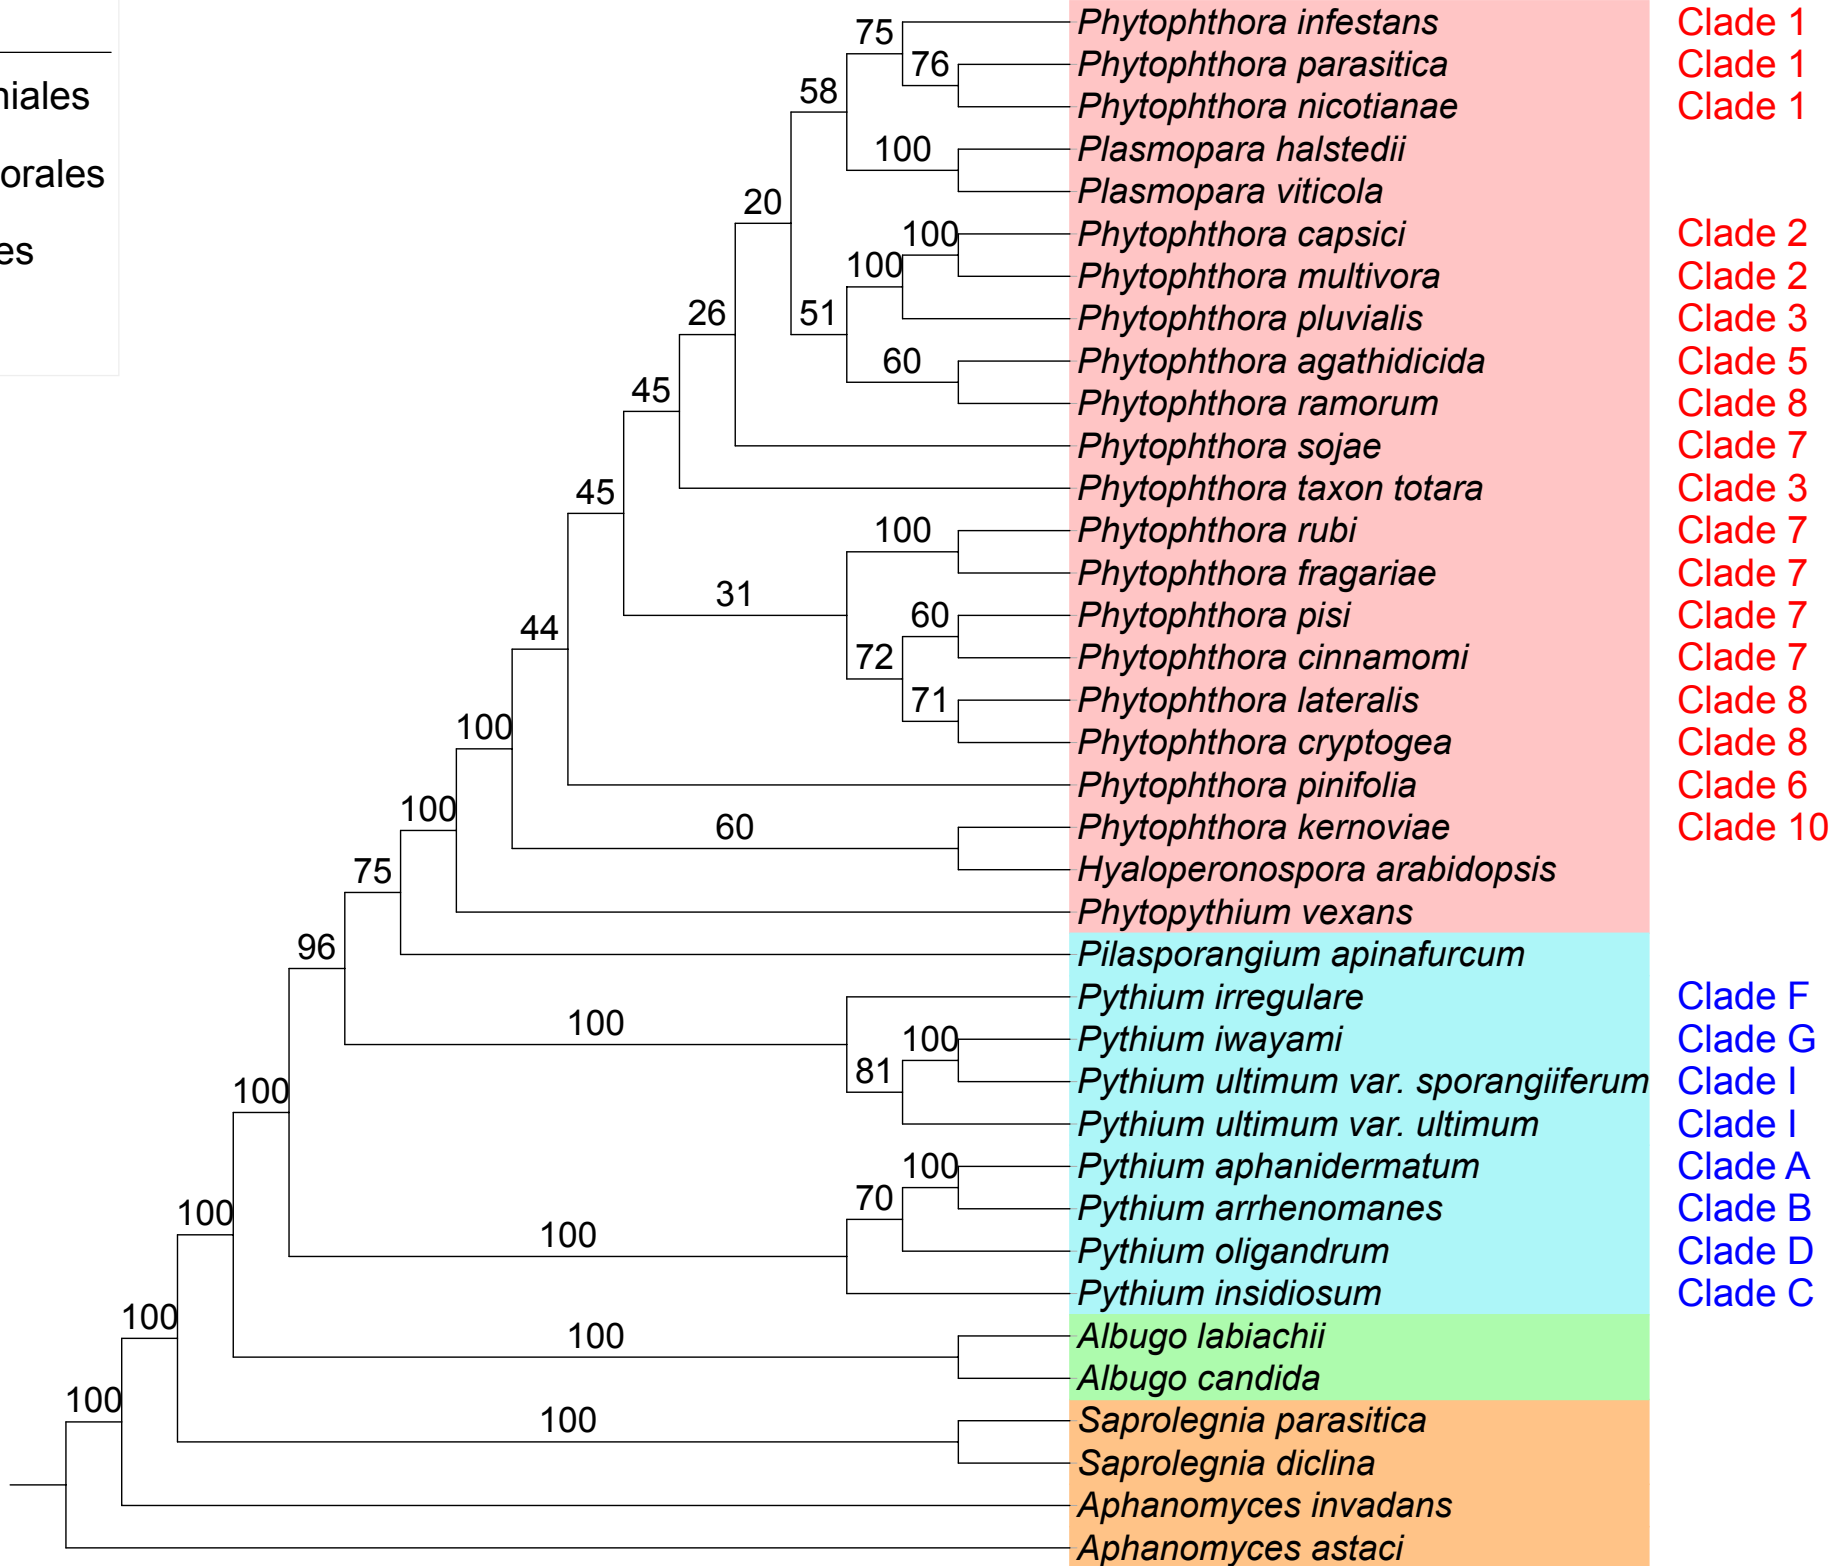

Supplement: sph002172267sf2.pdf [file sph002172267sf2.pdf]
